# Supplementary material
Source: PubMed Central journal article supplement (PMC10991208)
Supplement: 262_2021_3091_MOESM1_ESM.pdf [file 262_2021_3091_MOESM1_ESM.pdf]

**Table S1. Objective response rate in prespecified subgroups.**

| <b>Prespecified subgroups</b> | <b>n</b> | <b>Objective response rate,<br/>% (95% CI)</b> |
|-------------------------------|----------|------------------------------------------------|
| Gender                        |          |                                                |
| Male                          | 115      | 20.0 (13.1–28.5)                               |
| Female                        | 31       | 9.7 (2.0–25.8)                                 |
| Tumor histology               |          |                                                |
| Squamous cell carcinoma       | 66       | 25.8 (15.8–38.0)                               |
| Non-squamous cell carcinoma   | 80       | 11.3 (5.3–20.3)                                |
| Line of previous treatment    |          |                                                |
| <2                            | 111      | 17.1 (10.6–25.4)                               |
| ≥2                            | 35       | 20.0 (8.4–36.9)                                |
| Brain metastases              |          |                                                |
| Yes                           | 19       | 0                                              |
| No                            | 127      | 20.5 (13.8–28.5)                               |
| <i>EGFR</i> mutation status   |          |                                                |
| Wildtype- <i>EGFR</i>         | 140      | 18.6 (12.5–26.0)                               |
| Mutant- <i>EGFR</i> *         | 6        | 0                                              |
| ECOG performance status       |          |                                                |
| 0                             | 8        | 25.0 (3.2–65.1)                                |
| 1                             | 138      | 17.4 (11.5–24.8)                               |
| Age                           |          |                                                |
| <65                           | 108      | 17.6 (10.9–26.1)                               |
| ≥65                           | 38       | 18.4 (7.7–34.3)                                |
| PD-L1 expression              |          |                                                |
| TPS<1%                        | 74       | 12.2 (5.7–21.8)                                |
| TPS≥1%                        | 72       | 23.6 (14.4–35.1)                               |

ECOG, Eastern Cooperative Oncology Group; TPS, tumor proportion score. \*

One patient in PD-L1 ≥50% group were re-classified into PD-L1<1% group after PD-L1 expression re-evaluation.
